# Supplementary material for: H2B Mono-ubiquitylation Facilitates Fork Stalling and Recovery during Replication Stress by Coordinating Rad53 Activation and Chromatin Assembly
Source: PubMed Central journal article supplement (PMC4183429; doi:10.1371/journal.pgen.1004667), 2014-10-02
Supplement: pgen.1004667.s007.pdf [file pgen.1004667.s007.pdf]

**Table S1** Strain list

| Strain                      | Genotype                                                                                                                                         | Source                |
|-----------------------------|--------------------------------------------------------------------------------------------------------------------------------------------------|-----------------------|
| Y131                        | <i>MATa hta1-htb1Δ::LEU2 hta2-htb2Δ leu2-3,-112 his3-11,-15 trp1-1 ade2-1 can1-100 ura3-1 &lt;pRS426-HTA1-HTB1&gt;</i>                           | K. Robzyk[1]          |
| CFK1065<br>(YS131)          | <i>MATa hta1-htb1Δ hta2-htb2Δ leu2-3,-112 his3-11,-15 trp1-1 ade2-1 can 1-100 ura3-1 &lt;pRS426-HTA1-HTB1&gt;</i>                                | Y131<br>This study    |
| CFK1179<br>(YS131<br>bar1Δ) | <i>MATa hta1-htb1Δ hta2-htb2Δ bar1Δ::LEU2 his3-11,-15 trp1-1 ade2-1 can 1-100 ura3-1 &lt;pRS426-HTA1-HTB1&gt;</i>                                | CFK1065<br>This study |
| CFK1204<br>(YCL001)         | <i>MATa hta1-htb1Δ hta2-htb2Δ bar1Δ::LEU2 his3-11,-15 trp1-1 ade2-1 can1-100 ura3-1 &lt;pZS145-HTA1-Flag-HTB1 CEN HIS3&gt;</i>                   | CFK1179<br>This study |
| CFK1202                     | <i>MATa hta1-htb1Δ hta2-htb2Δ bar1Δ::LEU2 hir1Δ::KAN+ his3-11,-15 trp1-1 ade2-1 can1-100 ura3-1 &lt;pZS145-HTA1-Flag-HTB1 CEN HIS3&gt;</i>       | CFK1204<br>This study |
| CFK1206                     | <i>MATa hta1-htb1Δ hta2-htb2Δ bar1Δ::LEU2 cac1Δ::KAN+ his3-11,-15 trp1-1 ade2-1 can1-100 ura3-1 &lt;pZS145-HTA1-Flag-HTB1 CEN HIS3&gt;</i>       | CFK1204<br>This study |
| CFK1208                     | <i>MATa hta1-htb1Δ hta2-htb2Δ bar1Δ::LEU2 asf1Δ::KAN+ his3-11,-15 trp1-1 ade2-1 can1-100 ura3-1 &lt;pZS145-HTA1-Flag-HTB1 CEN HIS3&gt;</i>       | CFK1204<br>This study |
| CFK1212                     | <i>MATa hta1-htb1Δ hta2-htb2Δ bar1Δ::LEU2 rtt109Δ::KAN+ his3-11,-15 trp1-1 ade2-1 can1-100 ura3-1 &lt;pZS145-HTA1-Flag-HTB1 CEN HIS3&gt;</i>     | CFK1204<br>This study |
| CFK1231<br>(YMW001)         | <i>MATa hta1-htb1Δ hta2-htb2Δ bar1Δ::LEU2 his3-11,-15 trp1-1 ade2-1 can1-100 ura3-1 &lt;pZS146-HTA1-Flag-htb1-K123R CEN HIS3&gt;</i>             | CFK1179<br>This study |
| CFK1233                     | <i>MATa hta1-htb1Δ hta2-htb2Δ bar1Δ::LEU2 asf1Δ::KAN+ his3-11,-15 trp1-1 ade2-1 can1-100 ura3-1 &lt;pZS146-HTA1-Flag-htb1-K123R CEN HIS3&gt;</i> | CFK1231<br>This study |
| CFK1235                     | <i>MATa hta1-htb1Δ hta2-htb2Δ bar1Δ::LEU2 hir1Δ::KAN+ his3-11,-15 trp1-1 ade2-1 can1-100 ura3-1 &lt;pZS146-HTA1-Flag-htb1-K123R CEN HIS3&gt;</i> | CFK1231<br>This study |
| CFK1237                     | <i>MATa hta1-htb1Δ hta2-htb2Δ bar1Δ::LEU2 cac1Δ::KAN+ his3-11,-15 trp1-1 ade2-1 can1-100 ura3-1</i>                                              | CFK1231<br>This study |

|         |                                                                                                                                                           |                       |
|---------|-----------------------------------------------------------------------------------------------------------------------------------------------------------|-----------------------|
|         | <pZS146-HTA1-Flag-htb1-K123R CEN HIS3>                                                                                                                    |                       |
| CFK1241 | <i>MATa hta1-htb1Δ hta2-htb2Δ bar1Δ::LEU2 rtt109Δ::KAN+ his3-11,-15 trp1-1 ade2-1 can1-100 ura3-1</i><br><pZS146-HTA1-Flag-htb1-K123R CEN HIS3>           | CFK1231<br>This study |
| CFK1419 | <i>MATa hta1-htb1Δ hta2-htb2Δ bar1Δ::LEU2 his3-11,-15 trp1-1 ade2-1 can1-100 ura3-1</i><br><pZS145-HTA1-Flag-HTB1 CEN HIS3><br><p404-BrdU-Inc-TRP1>       | CFK1204<br>This study |
| CFK1421 | <i>MATa hta1-htb1Δ hta2-htb2Δ bar1Δ::LEU2 his3-11,-15 trp1-1 ade2-1 can1-100 ura3-1</i><br><pZS146-HTA1-Flag-htb1-K123R CEN HIS3><br><p404-BrdU-Inc-TRP1> | CFK1231<br>This study |
| CFK1443 | <i>MATa hta1-htb1Δ hta2-htb2Δ bar1Δ::LEU2 bre1Δ::KAN+ his3-11,-15 trp1-1 ade2-1 can1-100 ura3-1</i><br><pZS145-HTA1-Flag-HTB1 CEN HIS3>                   | CFK1204<br>This study |
| CFK1444 | <i>MATa hta1-htb1Δ hta2-htb2Δ bar1Δ::LEU2 mrc1Δ::KAN+ his3-11,-15 trp1-1 ade2-1 can1-100 ura3-1</i><br><pZS145-HTA1-Flag-HTB1 CEN HIS3>                   | CFK1204<br>This study |
| CFK1447 | <i>MATa hta1-htb1Δ hta2-htb2Δ bar1Δ::LEU2 sgs1Δ::KAN+ his3-11,-15 trp1-1 ade2-1 can1-100 ura3-1</i><br><pZS145-HTA1-Flag-HTB1 CEN HIS3>                   | CFK1204<br>This study |
| CFK1450 | <i>MATa hta1-htb1Δ hta2-htb2Δ bar1Δ::LEU2 mrc1Δ::KAN+ his3-11,-15 trp1-1 ade2-1 can1-100 ura3-1</i><br><pZS146-HTA1-Flag-htb1-K123R CEN HIS3>             | CFK1231<br>This study |
| CFK1453 | <i>MATa hta1-htb1Δ hta2-htb2Δ bar1Δ::LEU2 sgs1Δ::KAN+ his3-11,-15 trp1-1 ade2-1 can1-100 ura3-1</i><br><pZS146-HTA1-Flag-htb1-K123R CEN HIS3>             | CFK1231<br>This study |
| CFK1481 | <i>MATa hta1-htb1Δ hta2-htb2Δ bar1Δ::LEU2 sml1Δ::KAN+ his3-11,-15 trp1-1 ade2-1 can1-100 ura3-1</i><br><pZS145-HTA1-Flag-HTB1 CEN HIS3>                   | CFK1204<br>This study |
| CFK1482 | <i>MATa hta1-htb1Δ hta2-htb2Δ bar1Δ::LEU2 sml1Δ::KAN+ his3-11,-15 trp1-1 ade2-1 can1-100 ura3-1</i><br><pZS146-HTA1-Flag-htb1-K123R CEN HIS3>             | CFK1231<br>This study |
| CFK1764 | <i>MATa hta1-htb1Δ hta2-htb2Δ bar1Δ::LEU2 sgs1-13myc::HIS3 pep4Δ::HPH+ trp1-1 ade2-1 can1-100 ura3-1</i> <pRS414-HTA1-Flag-HTB1 CEN TRP>                  | Y131<br>This study    |
| CFK1765 | <i>MATa hta1-htb1Δ hta2-htb2Δ bar1Δ::LEU2 sgs1-13myc::HIS3 pep4Δ::HPH+ trp1-1 ade2-1 can1-100 ura3-1</i>                                                  | Y131<br>This study    |

|                      |                                                                                                                                                                        |                          |
|----------------------|------------------------------------------------------------------------------------------------------------------------------------------------------------------------|--------------------------|
|                      | <i>1-100 ura3-1 &lt;pRS414-HTA1-Flag-htb1-K123R CEN TRP&gt;</i>                                                                                                        |                          |
| CFK1984              | <i>MATa hta1-htb1Δ hta2-htb2Δ bar1Δ::LEU2 pol1-17 his3-11,-15 trp1-1 ade2-1 can1-100 ura3-1 &lt;pZS145-HTA1-Flag-HTB1 CEN HIS3&gt;</i>                                 | CFK1204<br>This study    |
| CFK1986              | <i>MATa hta1-htb1Δ hta2-htb2Δ bar1Δ::LEU2 pol1-17 his3-11,-15 trp1-1 ade2-1 can1-100 ura3-1 &lt;pZS146-HTA1-Flag-htb1-K123R CEN HIS3&gt;</i>                           | CFK1231<br>This study    |
| CFK1988              | <i>MATa hta1-htb1Δ hta2-htb2Δ bar1Δ::LEU2 pri2-1 his3-11,-15 trp1-1 ade2-1 can1-100 ura3-1 &lt;pZS145-HTA1-Flag-HTB1 CEN HIS3&gt;</i>                                  | CFK1204<br>This study    |
| CFK1990              | <i>MATa hta1-htb1Δ hta2-htb2Δ bar1Δ::LEU2 pri2-1 his3-11,-15 trp1-1 ade2-1 can1-100 ura3-1 &lt;pZS146-HTA1-Flag-htb1-K123R CEN HIS3&gt;</i>                            | CFK1231<br>This study    |
| CFK1992              | <i>MATa hta1-htb1Δ hta2-htb2Δ bar1Δ::LEU2 pol3-14 his3-11,-15 trp1-1 ade2-1 can1-100 ura3-1 &lt;pZS145-HTA1-Flag-HTB1 CEN HIS3&gt;</i>                                 | CFK1204<br>This study    |
| CFK1994              | <i>MATa hta1-htb1Δ hta2-htb2Δ bar1Δ::LEU2 pol3-14 his3-11,-15 trp1-1 ade2-1 can1-100 ura3-1 &lt;pZS146-HTA1-Flag-htb1-K123R CEN HIS3&gt;</i>                           | CFK1231<br>This study    |
| CFK2000              | <i>MATa hta1-htb1Δ hta2-htb2Δ bar1Δ::LEU2 his3-11,-15 trp1-1 ade2-1 can 1-100 ura3-1 &lt;pRS426-HTA1-HTB1&gt; &lt;pZS145-HTA1-Flag-HTB1 CEN HIS3&gt;</i>               | CFK1179<br>This study    |
| CFK2002              | <i>MATa hta1-htb1Δ hta2-htb2Δ bar1Δ::LEU2 his3-11,-15 trp1-1 ade2-1 can 1-100 ura3-1 &lt;pRS426-HTA1-HTB1&gt; &lt;pZS146-HTA1-Flag-htb1-K123R CEN HIS3&gt;</i>         | CFK1179<br>This study    |
| CFK2004              | <i>MATa hta1-htb1Δ hta2-htb2Δ bar1Δ::LEU2 pol2-11 his3-11,-15 trp1-1 ade2-1 can 1-100 ura3-1 &lt;pRS426-HTA1-HTB1&gt; &lt;pZS145-HTA1-Flag-HTB1 CEN HIS3&gt;</i>       | CFK1179<br>This study    |
| CFK2006              | <i>MATa hta1-htb1Δ hta2-htb2Δ bar1Δ::LEU2 pol2-11 his3-11,-15 trp1-1 ade2-1 can 1-100 ura3-1 &lt;pRS426-HTA1-HTB1&gt; &lt;pZS146-HTA1-Flag-htb1-K123R CEN HIS3&gt;</i> | CFK1179<br>This study    |
| CFK2346<br>(GA-4978) | <i>MATa Rad5+ mec1-100::LEU2(HIS+) ade2-1 ura3-1 his3-11 trp1-1 leu2-3,112 can 1-100</i>                                                                               | W303 Rad5+<br>(Susan M.) |

|                      |                                                                                                                                                                                    |                                          |
|----------------------|------------------------------------------------------------------------------------------------------------------------------------------------------------------------------------|------------------------------------------|
|                      |                                                                                                                                                                                    | Gasser)[2]                               |
| CFK2347<br>(GA-1491) | <i>MATa rad53-11 ade2-1 ura3-1 his3-11 trp1-1 leu2-3,112 can 1-100</i>                                                                                                             | W303<br>(NOY408-1b)<br>(Susan M. Gasser) |
| CFK2351<br>(GA-180)  | <i>MATa ade2-1 ura3-1 his3-11 trp1-1 leu2-3,112 can 1-100</i>                                                                                                                      | W303<br>(NOY408-1b)<br>(Susan M. Gasser) |
| CFK2352<br>(GA-1981) | <i>MATa Rad5+ ade2-1 ura3-1 his3-11 trp1-1 leu2-3,112 can 1-100</i>                                                                                                                | W303 Rad5+<br>(Susan M. Gasser)          |
| CFK2356              | <i>MATa Rad5+ mec1-100::LEU2(HIS+)<br/>HTA1-htb1-K123R::NAT+ HTA2-htb2-K123R::HIS+<br/>ade2-1 ura3-1 his3-11 trp1-1 leu2-3,112 can 1-100</i>                                       | GA4978<br>This study                     |
| CFK2358              | <i>MATa rad53-11 HTA1-htb1-K123R::NAT+<br/>HTA2-htb2-K123R::HIS+ ade2-1 ura3-1 his3-11 trp1-1<br/>leu2-3,112 can 1-100</i>                                                         | GA1491<br>This study                     |
| CFK2371              | <i>MATa hta1-htb1Δ hta2-htb2Δ bar1Δ::LEU2 sgs1Δ::<br/>NAT+ his3-11,-15 trp1-1 ade2-1 can1-100 ura3-1<br/>&lt;pZS145-HTA1-Flag-HTB1 CEN HIS3&gt;</i>                                | CFK1204<br>This study                    |
| CFK2373              | <i>MATa hta1-htb1Δ hta2-htb2Δ bar1Δ::LEU2 sgs1Δ::<br/>NAT+ bre1Δ:: KAN+ his3-11,-15 trp1-1 ade2-1<br/>can1-100 ura3-1 &lt;pZS145-HTA1-Flag-HTB1 CEN<br/>HIS3&gt;</i>               | CFK1204<br>This study                    |
| CFK2378              | <i>MATa rad53-11 bre1Δ:: KAN+ ade2-1 ura3-1 his3-11<br/>trp1-1 leu2-3,112 can 1-100</i>                                                                                            | GA1491<br>This study                     |
| CFK2414              | <i>MATa ade2-1 ura3-1 his3-11 trp1-1 leu2-3,112 can<br/>1-100</i>                                                                                                                  | W303<br>(NOY408-1b)<br>This study        |
| CFK2416              | <i>MATa HTA1-htb1-K123R::NAT+<br/>HTA2-htb2-K123R::HIS+ ade2-1 ura3-1 his3-11 trp1-1<br/>leu2-3,112 can 1-100</i>                                                                  | W303<br>(NOY408-1b)<br>This study        |
| YCL007               | <i>MATa hta1-htb1Δ hta2-htb2Δ bar1Δ::LEU2 sgs1Δ::<br/>KAN+ his3-11,-15 trp1-1 ade2-1 can1-100 ura3-1<br/>&lt;pZS145-HTA1-Flag-HTB1 CEN HIS3&gt;<br/>&lt;p404-BrdU-Inc-TRP1&gt;</i> | CFK1447<br>This study                    |
| YCL008               | <i>MATa hta1-htb1Δ hta2-htb2Δ bar1Δ::LEU2 sgs1Δ::</i>                                                                                                                              | CFK1453                                  |

|        |                                                                                                                                                                                  |                       |
|--------|----------------------------------------------------------------------------------------------------------------------------------------------------------------------------------|-----------------------|
|        | <i>KAN+ his3-11,-15 trp1-1 ade2-1 can1-100 ura3-1</i><br><pZS146-HTA1-Flag-htb1-K123R CEN HIS3><br><p404-BrdU-Inc-TRP1>                                                          | This study            |
| YMW069 | <i>MATa hta1-htb1Δ hta2-htb2Δ bar1Δ::LEU2 dun1Δ::</i><br><i>KAN+ his3-11,-15 trp1-1 ade2-1 can1-100 ura3-1</i><br><pZS145-HTA1-Flag-HTB1 CEN HIS3>                               | CFK1204<br>This study |
| YMW072 | <i>MATa hta1-htb1Δ hta2-htb2Δ bar1Δ::LEU2 dun1Δ::</i><br><i>KAN+ his3-11,-15 trp1-1 ade2-1 can1-100 ura3-1</i><br><pZS146-HTA1-Flag-htb1-K123R CEN HIS3>                         | CFK1231<br>This study |
| YMW093 | <i>MATa bre1Δ:: KAN+ ade2-1 ura3-1 his3-11 trp1-1</i><br><i>leu2-3,112 can 1-100</i>                                                                                             | GA-180<br>This study  |
| YMW095 | <i>MATa Rad5+ mec1-100::LEU2(HIS+) bre1Δ:: KAN+</i><br><i>ade2-1 ura3-1 his3-11 trp1-1 leu2-3,112 can 1-100</i>                                                                  | GA-4978<br>This study |
| YMW104 | <i>MATa hta1-htb1Δ hta2-htb2Δ bar1Δ::LEU2 asf1-3HA</i><br><i>his3-11,-15 trp1-1 ade2-1 can1-100 ura3-1 &lt;</i><br><i>pZS146-HTA1-Flag-htb1-K123R CEN HIS3&gt;</i>               | CFK1231<br>This study |
| YMW105 | <i>MATa hta1-htb1Δ hta2-htb2Δ bar1Δ::LEU2 asf1-3HA</i><br><i>his3-11,-15 trp1-1 ade2-1 can1-100 ura3-1</i><br><pZS145-HTA1-Flag-HTB1 CEN HIS3>                                   | CFK1204<br>This study |
| YCL023 | <i>MATa hta1-htb1Δ hta2-htb2Δ bar1Δ::LEU2 dun1Δ::</i><br><i>KAN+ his3-11,-15 trp1-1 ade2-1 can1-100 ura3-1</i><br><pZS145-HTA1-Flag-HTB1 CEN HIS3><br><p404-BrdU-Inc-TRP1>       | YMW069<br>This study  |
| YCL025 | <i>MATa hta1-htb1Δ hta2-htb2Δ bar1Δ::LEU2 dun1Δ::</i><br><i>KAN+ his3-11,-15 trp1-1 ade2-1 can1-100 ura3-1</i><br><pZS146-HTA1-Flag-htb1-K123R CEN HIS3><br><p404-BrdU-Inc-TRP1> | YMW072<br>This study  |

1. Robzyk K, Recht J, Osley MA (2000) Rad6-dependent ubiquitination of histone H2B in yeast. *Science* 287: 501-504.
2. Duncker BP, Shimada K, Tsai-Pflugfelder M, Pasero P, Gasser SM (2002) An N-terminal domain of Dbf4p mediates interaction with both origin recognition complex (ORC) and Rad53p and can deregulate late origin firing. *Proc Natl Acad Sci U S A* 99: 16087-16092.
