# Supplementary material for: H2B Mono-ubiquitylation Facilitates Fork Stalling and Recovery during Replication Stress by Coordinating Rad53 Activation and Chromatin Assembly
Source: PubMed Central journal article supplement (PMC4183429; doi:10.1371/journal.pgen.1004667), 2014-10-02
Supplement: pgen.1004667.s008.pdf [file pgen.1004667.s008.pdf]

**Table S2** Plasmid list

| Plasmids            | Relevant genotype            | Source         |
|---------------------|------------------------------|----------------|
| E1360<br>(pRS426)   | HTA1- HTB1 CEN URA           | K. Robzyk[1]   |
| E1547<br>(pZS145)   | HTA1-Flag-HTB1 CEN HIS3      | M. Osley       |
| E1118<br>(pZS146)   | HTA1-Flag-htb1-K123R<br>HIS3 | CEN M. Osley   |
| E1215<br>(p404)     | BrdU-Inc-TRP1                | O.M. Aparicio  |
| E1356<br>(pJH1318)  | YIP-pol1-17-URA              | J. Haber       |
| E1354<br>(pJH 1151) | YIPA16-pri2-1-URA            | J. Haber       |
| E1352               | pRS306-pol2-11-URA           | J. L. Campbell |
| E1358<br>(pJH1474)  | pMJ14-pol3-14-URA            | J. Haber       |
