# Supplementary material for: H2B Mono-ubiquitylation Facilitates Fork Stalling and Recovery during Replication Stress by Coordinating Rad53 Activation and Chromatin Assembly
Source: PubMed Central journal article supplement (PMC4183429; doi:10.1371/journal.pgen.1004667), 2014-10-02
Supplement: pgen.1004667.s009.pdf [file pgen.1004667.s009.pdf]

**Table S3.** Primer sequences used in this study

| Name            | Sequences                                 | Applications    |
|-----------------|-------------------------------------------|-----------------|
| RNR1-F          | 5'-TAC TGC GTG ACT TGG TTG-3'             | Gene expression |
| RNR1-R          | 5'-TTG GTA AGC CTT GAA TGG AG-3'          | Gene expression |
| CDC21-F         | 5'-ATT GTC TGA GCA AGG TGT-3'             | Gene expression |
| CDC21-R         | 5'-TCC TAC TTT CCT ATC TTT GAA CCC-3'     | Gene expression |
| RNR3-F          | 5'-CCA GCA TTC GTT GAG GT-3'              | Gene expression |
| RNR3-R          | 5'-GTA ATG ACT TTA GCA ATC TCG TG-3'      | Gene expression |
| HUG1-F          | 5'-CAA CCG TGT CAA CAA GAG T-3'           | Gene expression |
| HUG1-R          | 5'-CAA TGT CAG AAA GAC CGC C-3'           | Gene expression |
| DDI2-F          | 5'-CAG GTG GAA ATC AGG ACT ATG-3'         | Gene expression |
| DDI2-R          | 5'-CAA GGT GGT AAT GTA GCC AG-3'          | Gene expression |
| ARS305-F        | 5'-GGA CGA TAA TGT AAA TAG TTG TGG        | ChIP (Sgs1)     |
| ARS305-R        | 5'-CAA AGA AGG CTC TGA AAT GC             | ChIP (Sgs1)     |
| ARS305 + 3.5K-F | 5'-TTG GGT GCC GCT ATT GAT                | ChIP (Sgs1)     |
| ARS305 + 3.5K-R | 5'-ACG GTT CAT TTG CTC TTC T              | ChIP (Sgs1)     |
| ARS607-F        | 5'-GAG CTT TGT CTT GTT TAT ATT TAG TTA CG | ChIP (Sgs1)     |
| ARS607-R        | 5'-CTT ACG CTG GGT ATT TTT TTT TTG G      | ChIP (Sgs1)     |
| ARS607 + 4K-F   | 5'-CAC ATT GTC AGT TGG TGG                | ChIP (Sgs1)     |
| ARS607 + 4K-R   | 5'-AGT CGC TAA TGT CAC TAT GG             | ChIP (Sgs1)     |
| ARS305 (nuc.)-F | 5'-ATT TCA GAG CCT TCT TTG GAG            | ChIP (H3)       |
| ARS305 (nuc.)-R | 5'-ATG AAA CTG GAC ATA TTT GAG GAA        | ChIP (H3)       |
| ARS607 (nuc.)-F | 5'-ACA CAT TAT TCG GCA CAG TAG            | ChIP (H3)       |
| ARS607 (nuc.)-R | 5'-TCG CAG TCC ATA GAA GGA G              | ChIP (H3)       |
| ARS501 (nuc.)-F | 5'-CTCCT CATCA TCATC CC                   | ChIP (H3)       |
| ARS501 (nuc.)-R | 5'-CGTAC ACTAG CCCGT TG                   | ChIP (H3)       |
